# Supplementary material
Source: HighWire-hosted journal article supplement (https://erj.ersjournals.com/content/59/4/2103246)

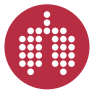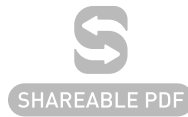

# Pulse oximeter measurements vary across ethnic groups: an observational study in patients with COVID-19

Colin J. Crooks <sup>1,2,3</sup>, Joe West <sup>2,3,4,5</sup>, Joanne R. Morling<sup>2,3,4</sup>, Mark Simmonds<sup>3</sup>, Irene Juurlink <sup>3</sup>, Steve Briggs <sup>3</sup>, Simon Cruickshank<sup>3</sup>, Susan Hammond-Pears<sup>3,5</sup>, Dominick Shaw <sup>3,6</sup>, Timothy R. Card<sup>2,3,4</sup> and Andrew W. Fogarty<sup>2,3,4</sup>

<sup>1</sup>Nottingham Digestive Diseases Centre, School of Medicine, University of Nottingham, Nottingham, UK. <sup>2</sup>NIHR Nottingham Biomedical Research Centre (BRC), Nottingham University Hospitals NHS Trust and the University of Nottingham, Nottingham, UK. <sup>3</sup>Nottingham University Hospitals NHS Trust, Nottingham, UK. <sup>4</sup>Population and Lifespan Sciences, School of Medicine, University of Nottingham, Nottingham, UK. <sup>5</sup>East Midlands Academic Health Science Network, University of Nottingham, Nottingham, UK. <sup>6</sup>Division of Respiratory Medicine, School of Medicine, University of Nottingham, Nottingham, UK.

Corresponding author: Andrew W. Fogarty ([andrew.fogarty@nottingham.ac.uk](mailto:andrew.fogarty@nottingham.ac.uk))

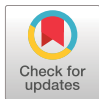

Shareable abstract (@ERSpublications)

Be aware that pulse oximeters overestimate oxygen saturation measurements in patients with hypoxaemia, and that this error is larger in individuals from black and Asian ethnic groups

<https://bit.ly/3fCeJP7>

**Cite this article as:** Crooks CJ, West J, Morling JR, *et al.* Pulse oximeter measurements vary across ethnic groups: an observational study in patients with COVID-19. *Eur Respir J* 2022; 59: 2103246 [DOI: 10.1183/13993003.03246-2021].

This single-page version can be shared freely online.

Copyright ©The authors 2022.

This version is distributed under the terms of the Creative Commons Attribution Non-Commercial Licence 4.0. For commercial reproduction rights and permissions contact [permissions@ersnet.org](mailto:permissions@ersnet.org)

Received: 24 June 2021

Accepted: 02 Jan 2022

*To the Editor:*

The pulse oximeter provides regular non-invasive measurements of blood oxygenation and is used in a wide range of clinical settings [1]. The light wave transmission that this technology uses is modified by skin pigmentation and thus may vary by skin colour. A recent study of paired measures of oxygen saturation from pulse oximetry and arterial blood gas reported differing outputs in patients with black skin compared to patients with white skin that has the potential to adversely impact on patient care [2].

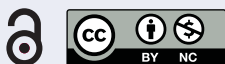

Supplement: inline-supplementary-material-1 [file inline-supplementary-material-1.pdf]
